# Supplementary material for: The NMDA receptor GluN2C subunit controls cortical excitatory-inhibitory balance, neuronal oscillations and cognitive function
Source: PubMed Central journal article supplement (PMC5138829; doi:10.1038/srep38321), 2016-12-06

**The NMDA receptor GluN2C subunit controls cortical excitatory-inhibitory balance,  
neuronal oscillations and cognitive function**

Subhash C. Gupta<sup>1</sup>, Aparna Ravikrishnan<sup>1</sup>, Jinxu Liu<sup>1</sup>, Zhihao Mao<sup>2</sup>, Ratnamala Pavuluri<sup>1</sup>,  
Brandon G. Hillman<sup>1</sup>, Pauravi Gandhi<sup>1</sup>, Dustin J. Stairs<sup>3</sup>, Ming Li<sup>4</sup>, Rajesh R. Ugale<sup>5</sup>, Daniel T.  
Monaghan<sup>2</sup> and Shashank M. Dravid<sup>1\*</sup>

Author affiliations:

<sup>1</sup>Department of Pharmacology, <sup>3</sup>Psychology, Creighton University, Omaha, NE 68178 USA,

<sup>2</sup>Department of Pharmacology and Experimental Therapeutics, University of Nebraska-Medical  
Center, Omaha, NE, <sup>4</sup>Department of Psychology, University of Nebraska-Lincoln, Lincoln, NE  
68588 USA, <sup>5</sup>Department of Pharmaceutical Sciences, R.T.M. Nagpur University, Nagpur,  
Maharashtra 440033 India.

Running title: GluN2C subunit regulates cortical E/I balance

Manuscript: Figures: 6; Tables: 1

Word count: Abstract: 242, Introduction: 497, Discussion: 1193.

Corresponding Author: Dr. Shashank M. Dravid, Department of Pharmacology, Creighton  
University, School of Medicine, 2500 California Plaza, Omaha, NE 68178, Phone: 402-280-  
1885, Fax: 402-280-2142, Email: [ShashankDravid@creighton.edu](mailto:ShashankDravid@creighton.edu)

**Supplementary figure 1.** (A) No significant differences in the frequency, amplitude or decay of sEPSCs of layer V pyramidal neurons in the mPFC were observed between WT and GluN2C KO mice (n=8 cells from 3-4 mice/genotype). Representative traces (a), cumulative probability plots for inter-event interval and amplitude and histograms for frequency and amplitude in inset (b, c) and histograms for decay (d). (B) No significant differences in the frequency or decay and a modest reduction in amplitude of sIPSCs of layer V pyramidal neurons in the mPFC in GluN2C KO mice (n=8 cells from 3-4 mice/genotype). Representative traces (a), Cumulative fraction plots for inter-event intervals and amplitude and histograms for frequency and amplitude in the inset (b, c) and decay kinetics (c, f). Only amplitude was modestly but significantly lower in GluN2C KO sIPSC (unpaired t-test with Welch's correction, \*P = 0.0110).

**Supplementary figure 2: Changes in dendritic spine density in different layers, and for different spine types in the mPFC of GluN2C KO mice.** (A) Dendritic spine density was significantly reduced in layer V of the mPFC in GluN2C KO mice; this reduction was observed for all spine types (\*P = 0.01295, stubby and P = 0.0101 thin and long spines and \*\*\*P = 0.0007 for filopodia-like spines, unpaired t-test with Welch's correction, n = 4/genotype), except for mushroom spines. (B, C) No significant difference in the oblique apical dendritic spine density was observed between WT and GluN2C KO mice at P10, P20 or P30. (B) Representative images of Golgi-stained sections and (C) quantitative results.

**Supplementary figure 3: No change in somatostatin labeling in GluN2C KO.** The number of somatostatin-positive cells in the mPFC of GluN2C KO was not different from wildtype.

# Supplementary figure 1

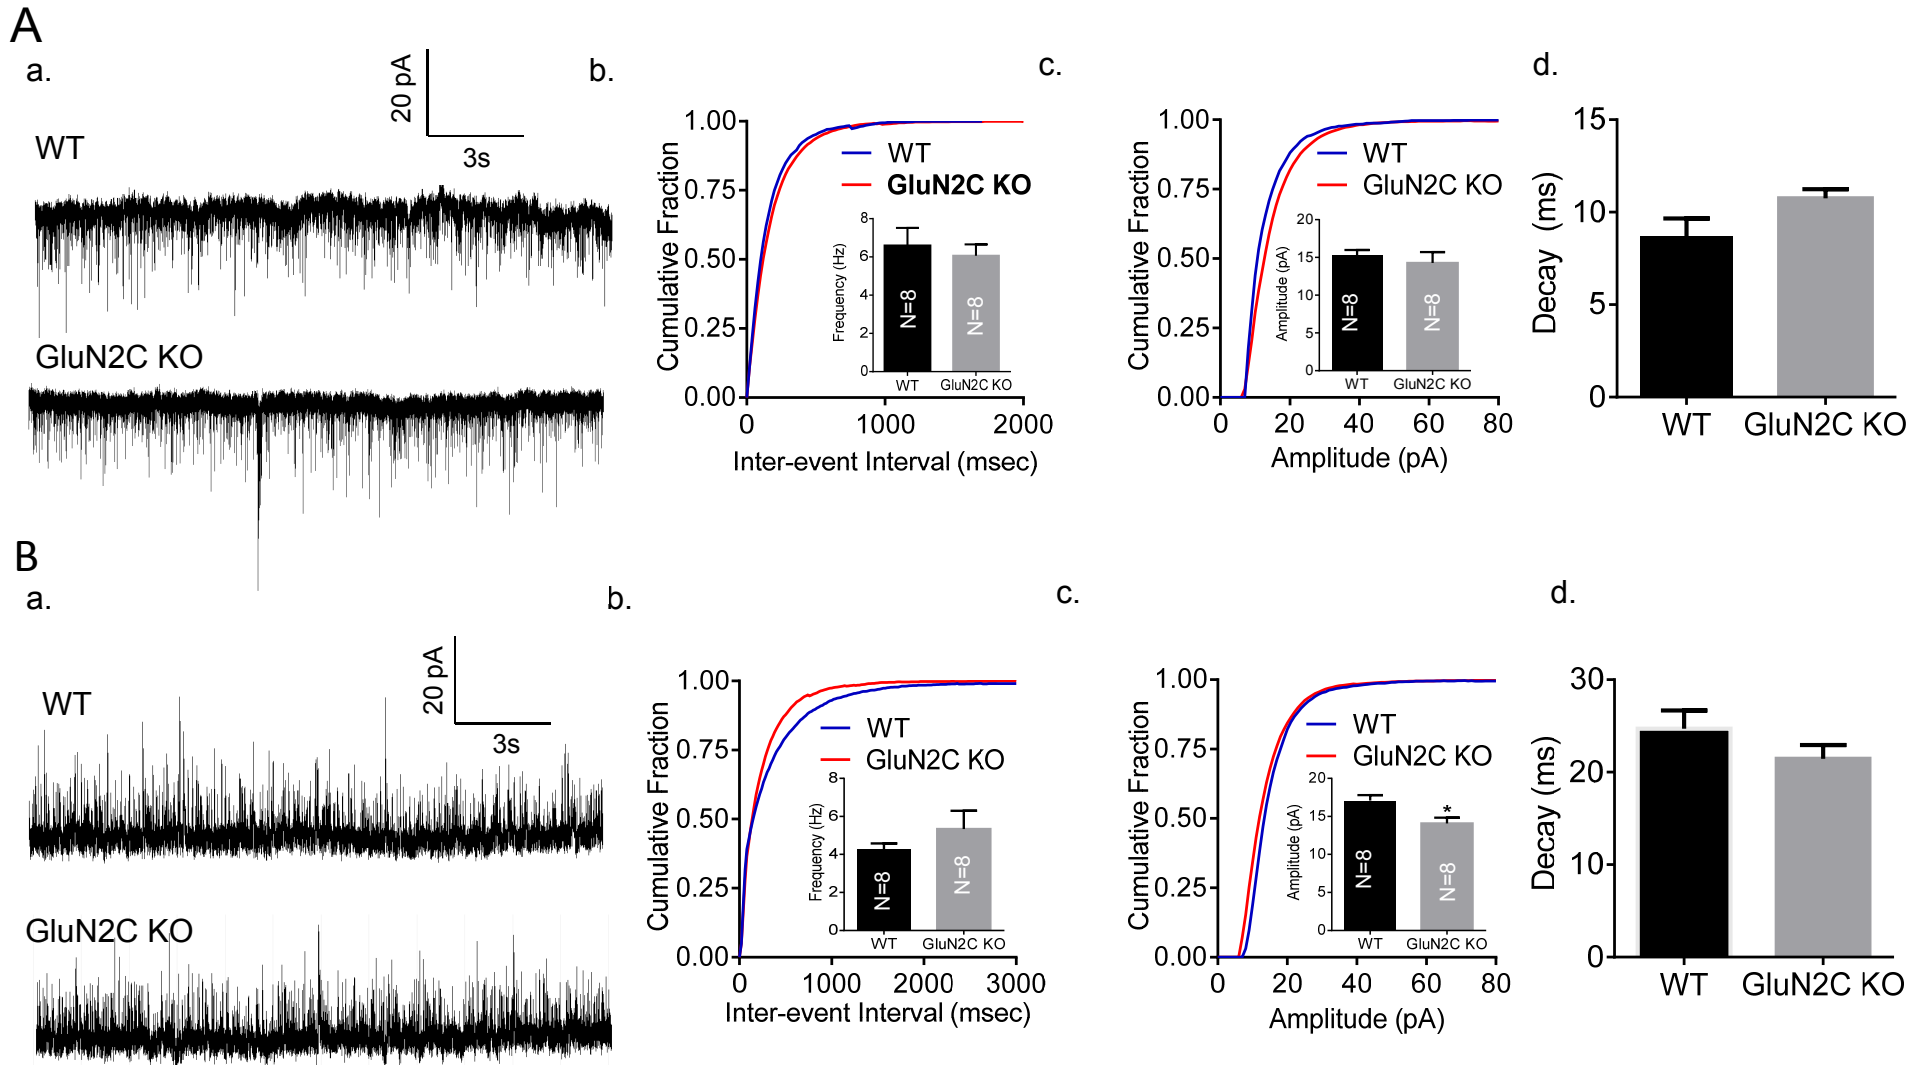

# Supplementary figure 2

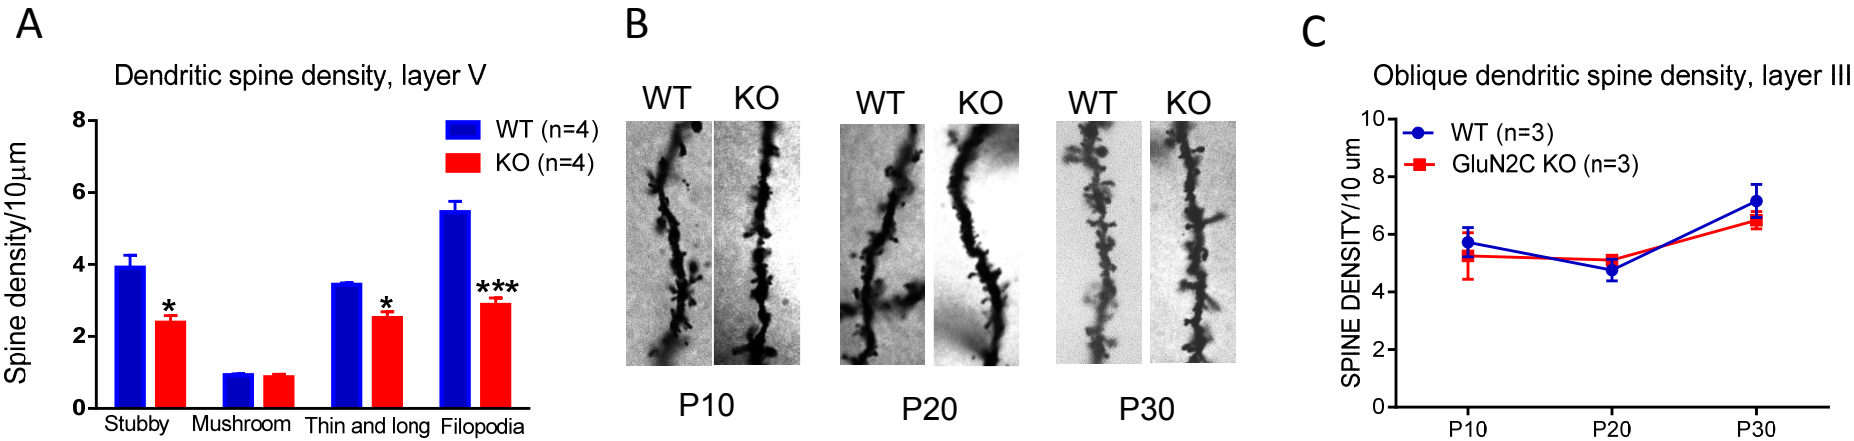

Supplementary figure 3

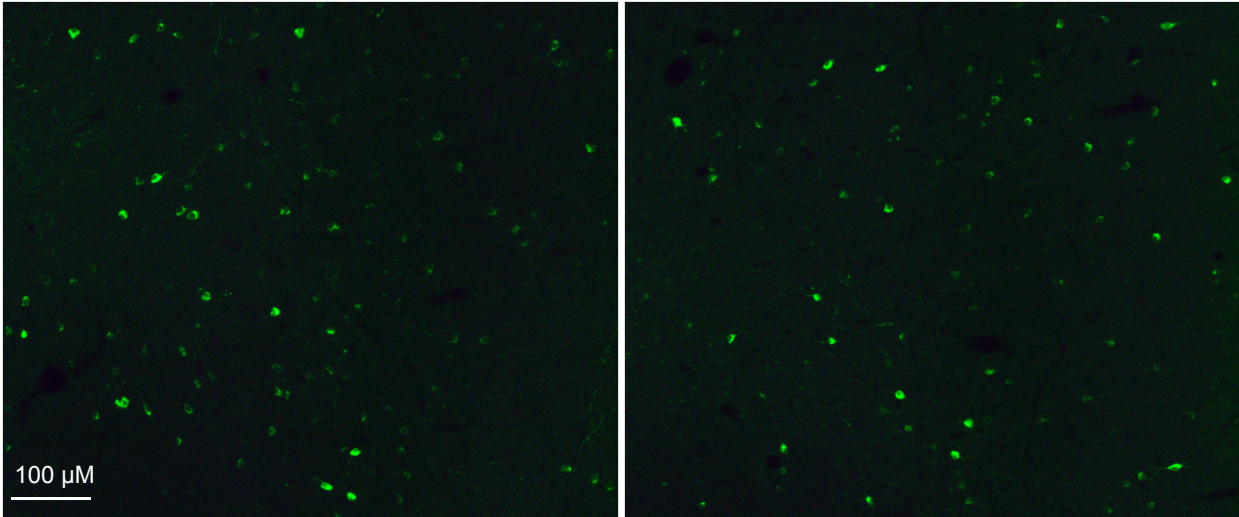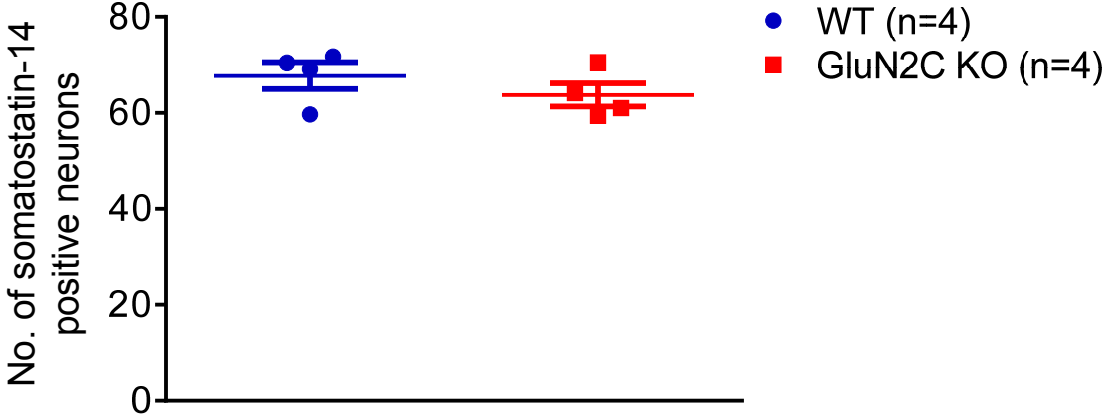

Figure 2A

# Dendritic spine data in mPFC of wild type mice

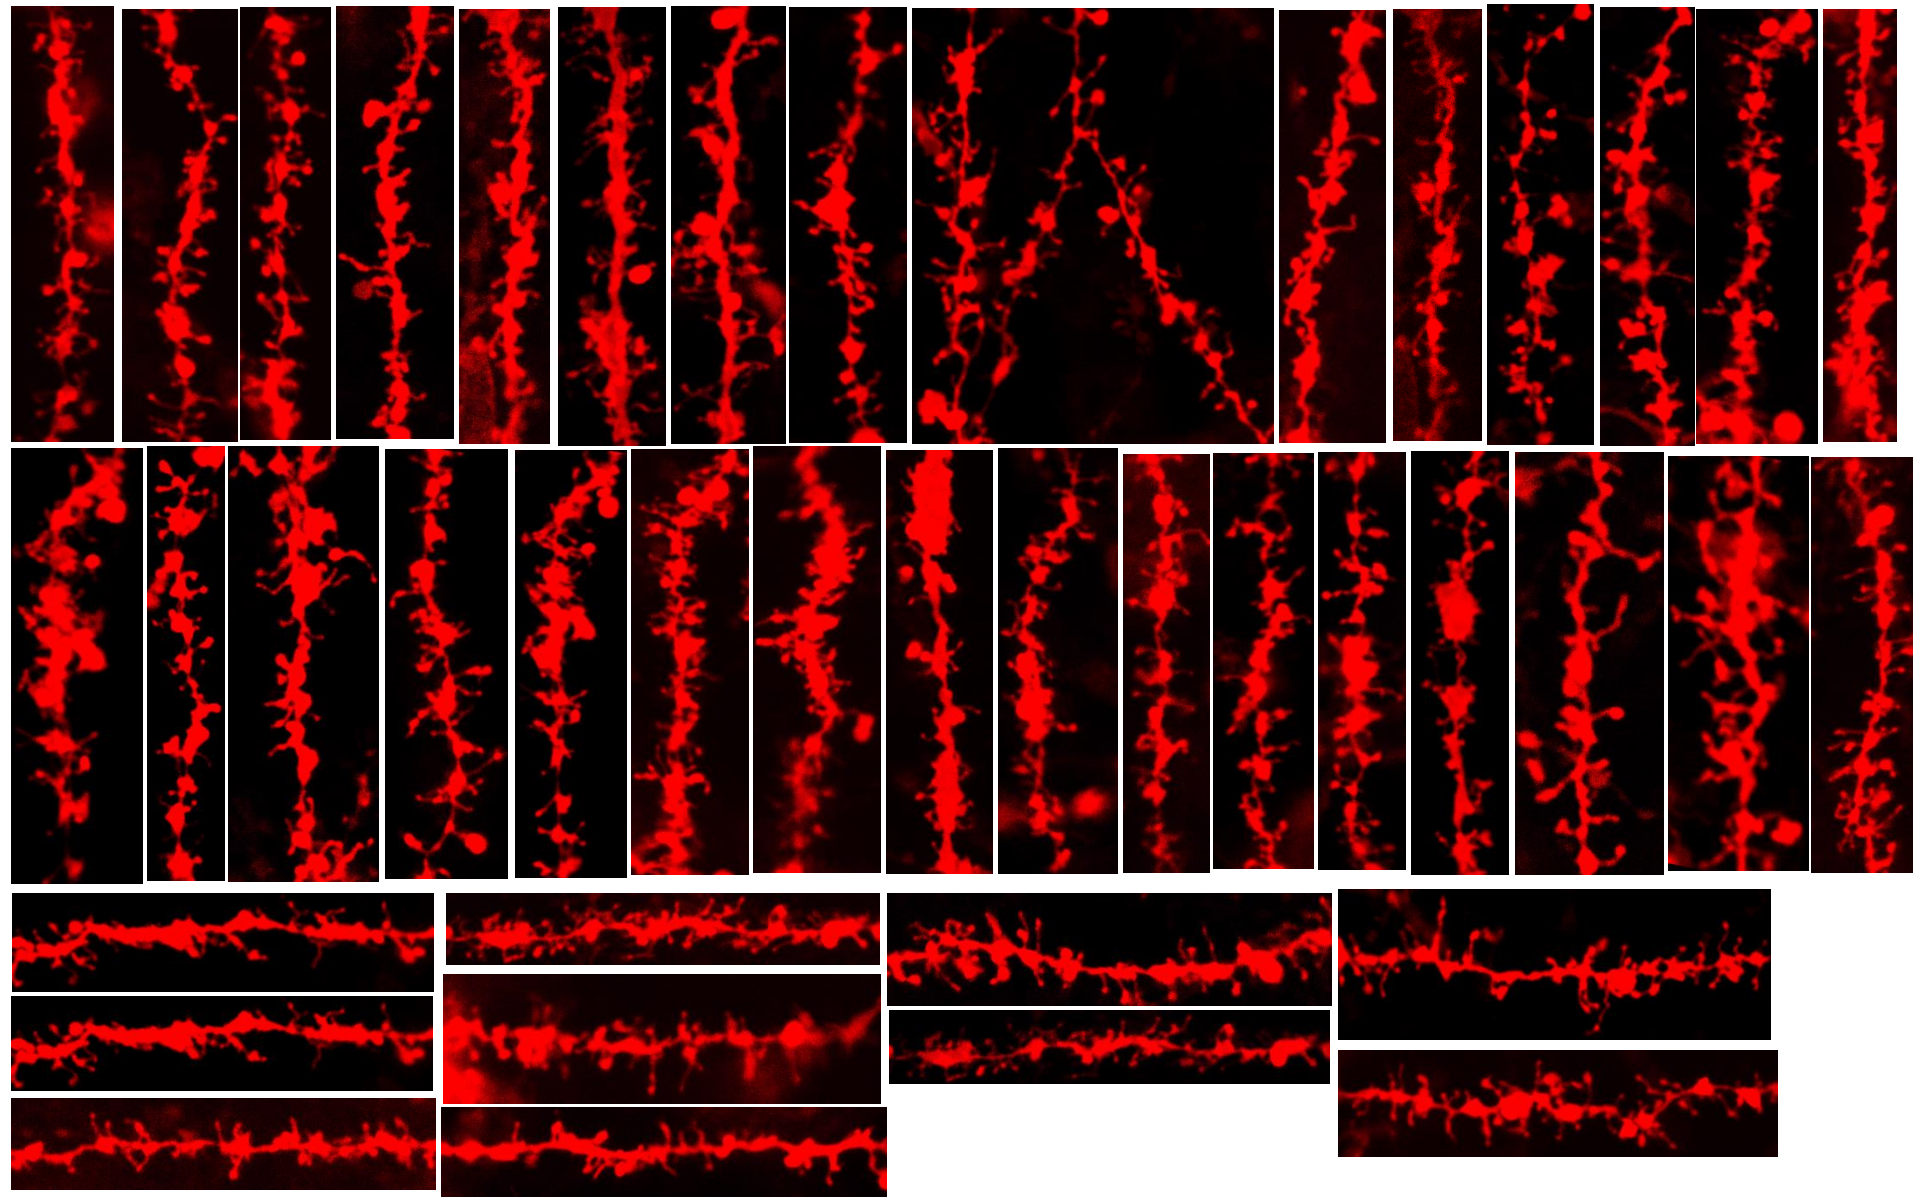

Figure 2A

# Dendritic spine in GluN2C KO mice

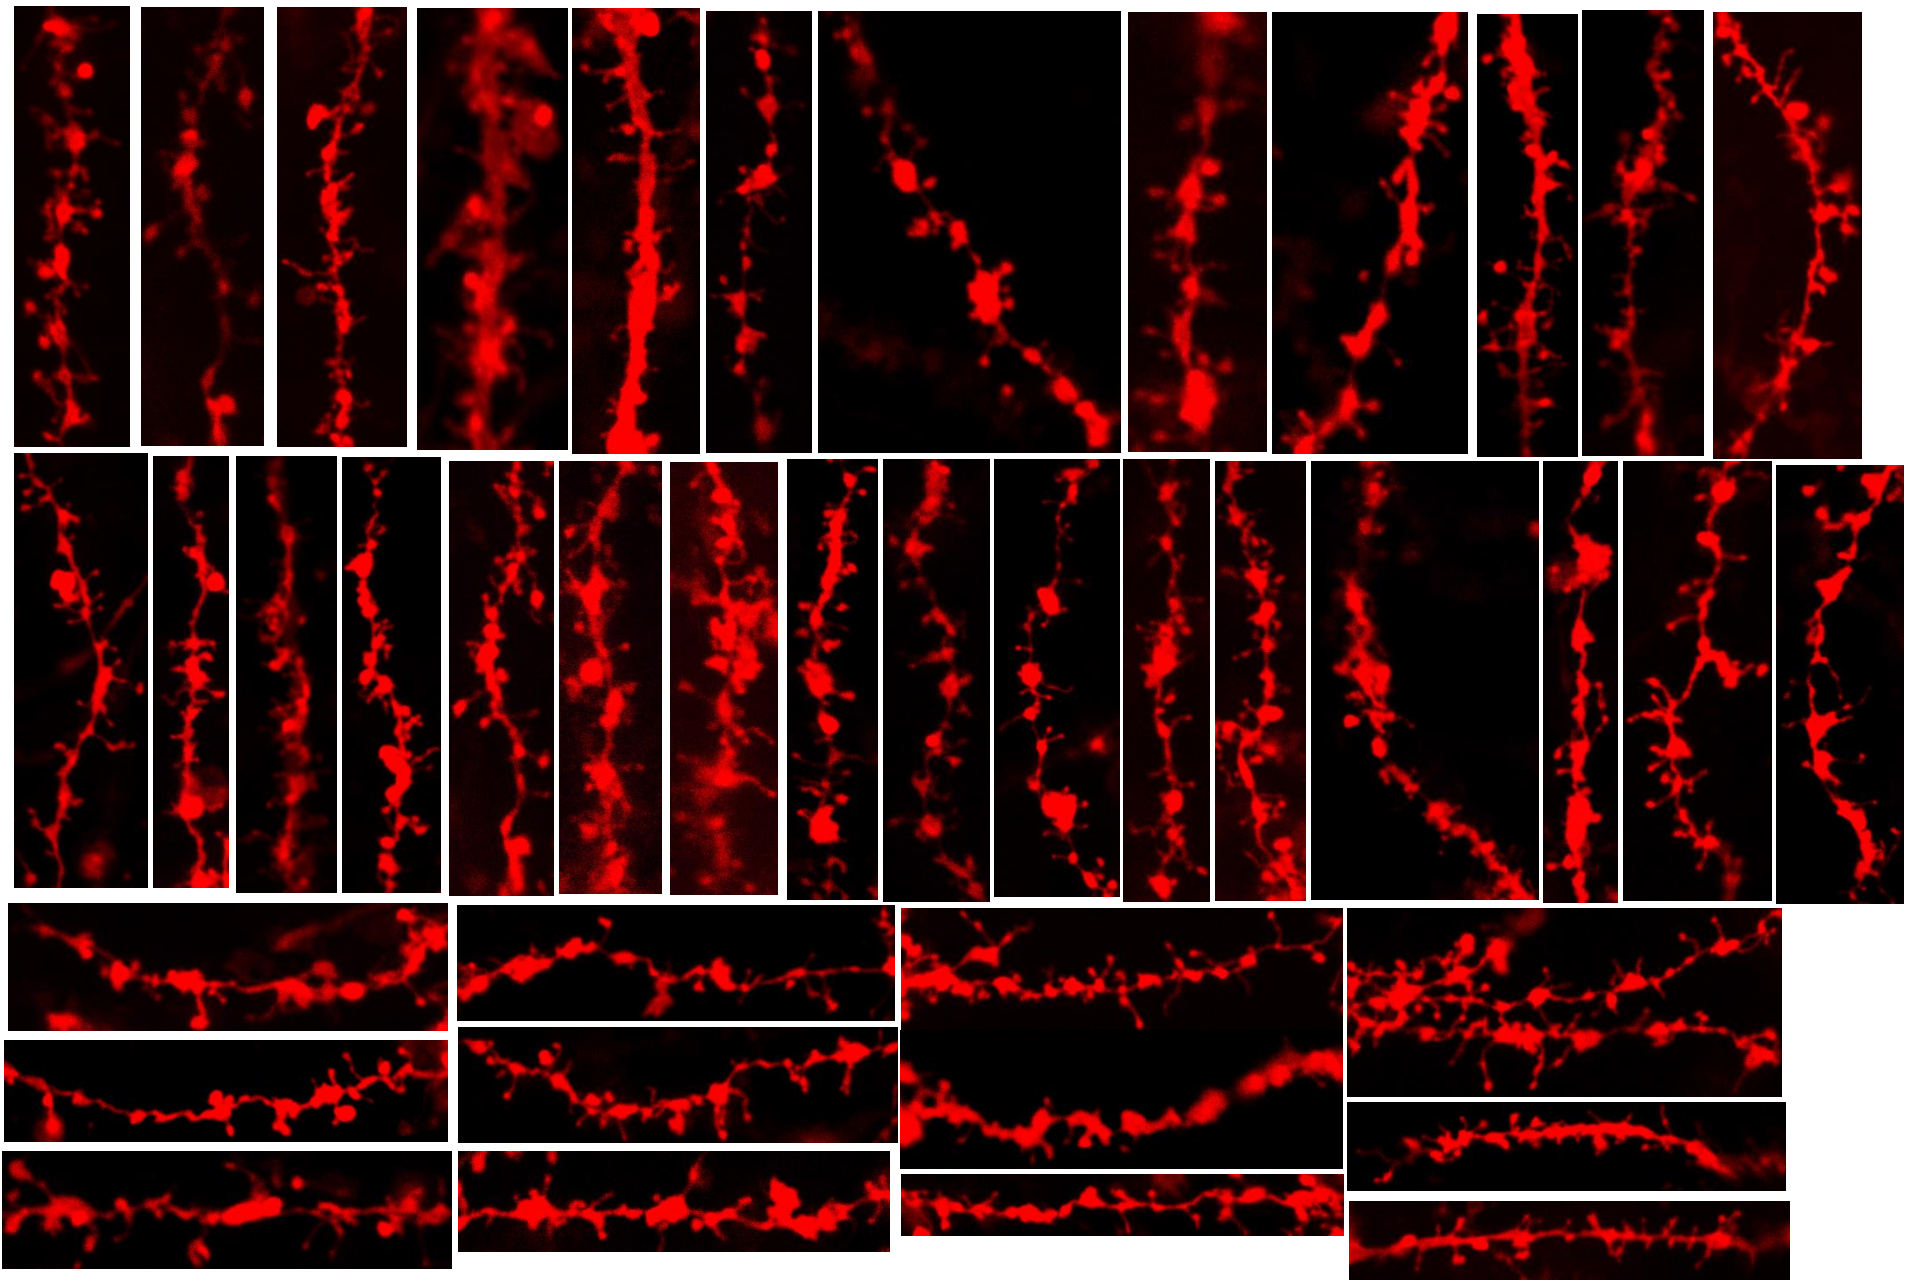

Figure 3A

WT (vGluT1-VGAT)

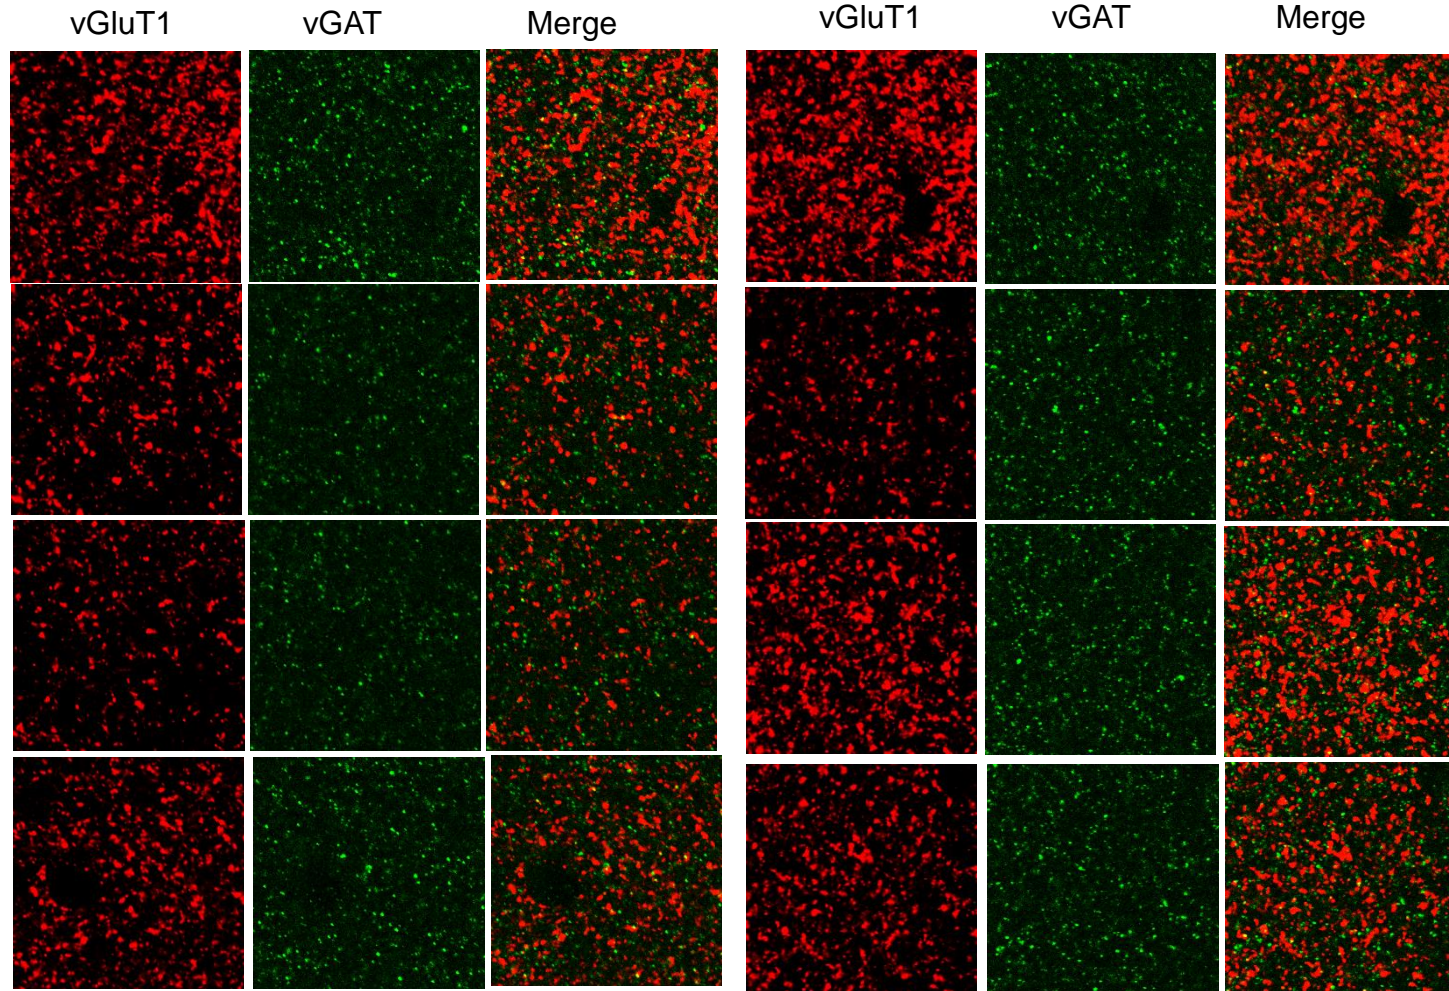



Figure 3A

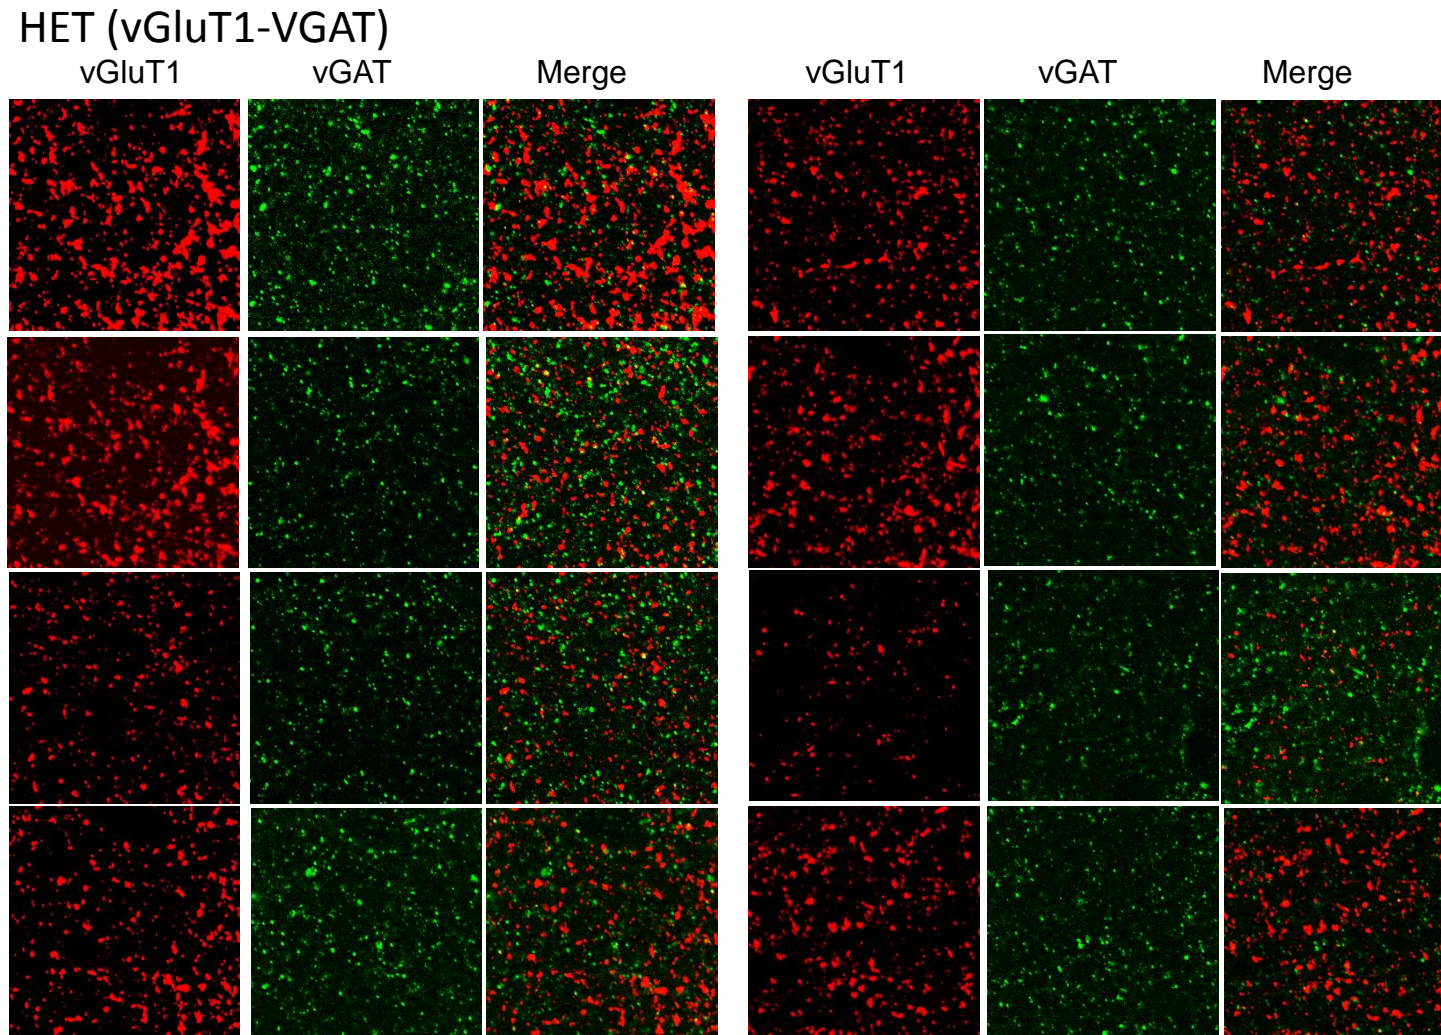

Figure 3A

GluN2C KO (vGluT1-VGAT)

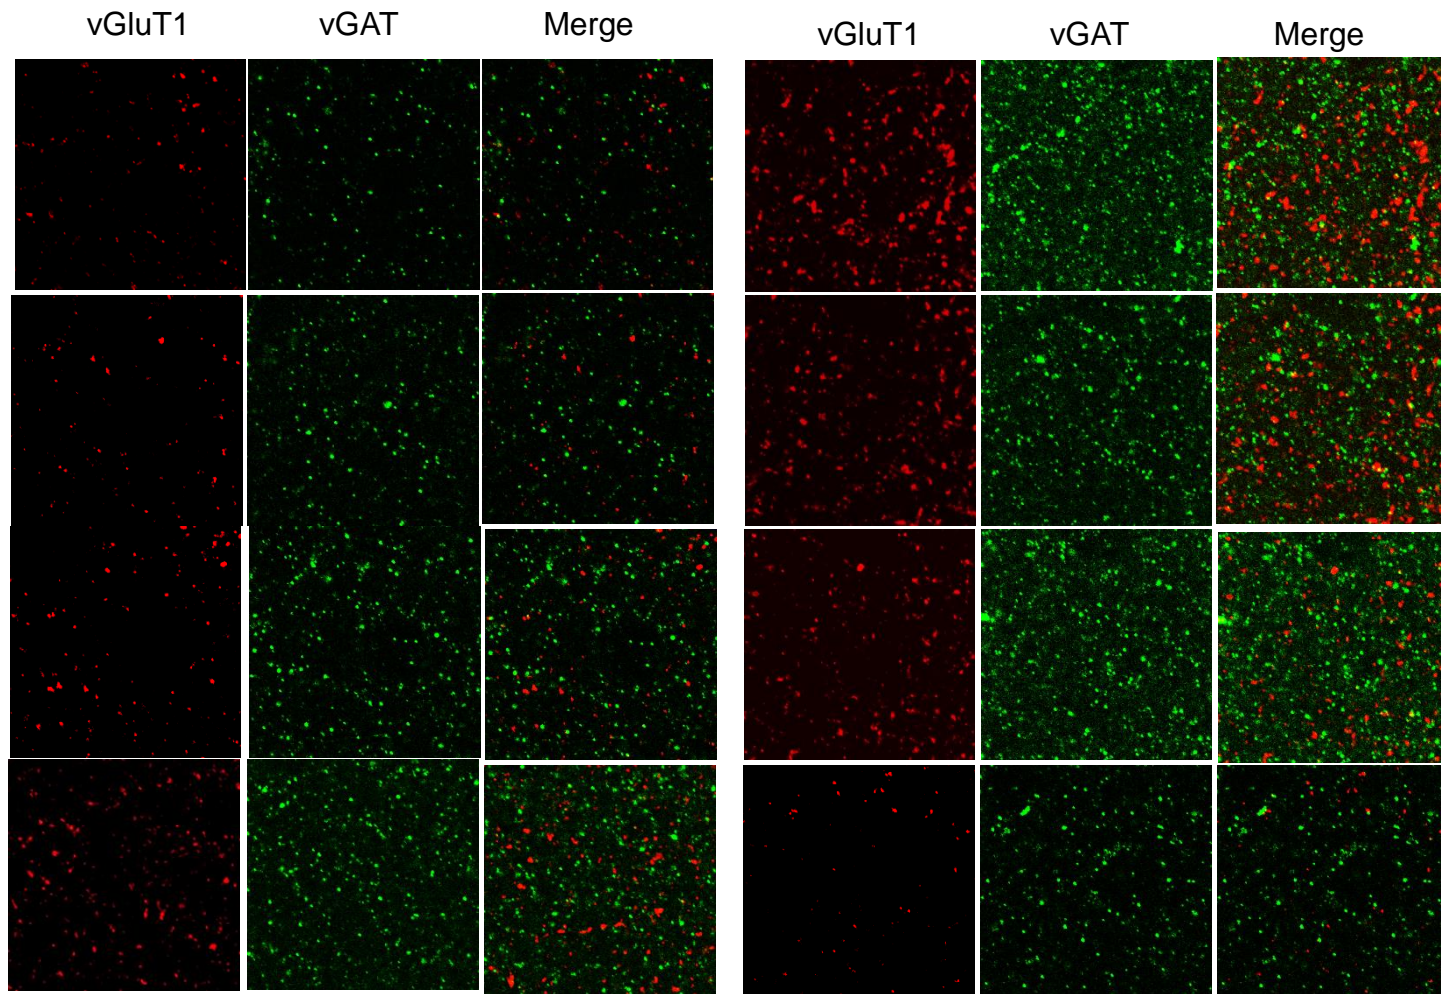

Figure 3C

PV-WT

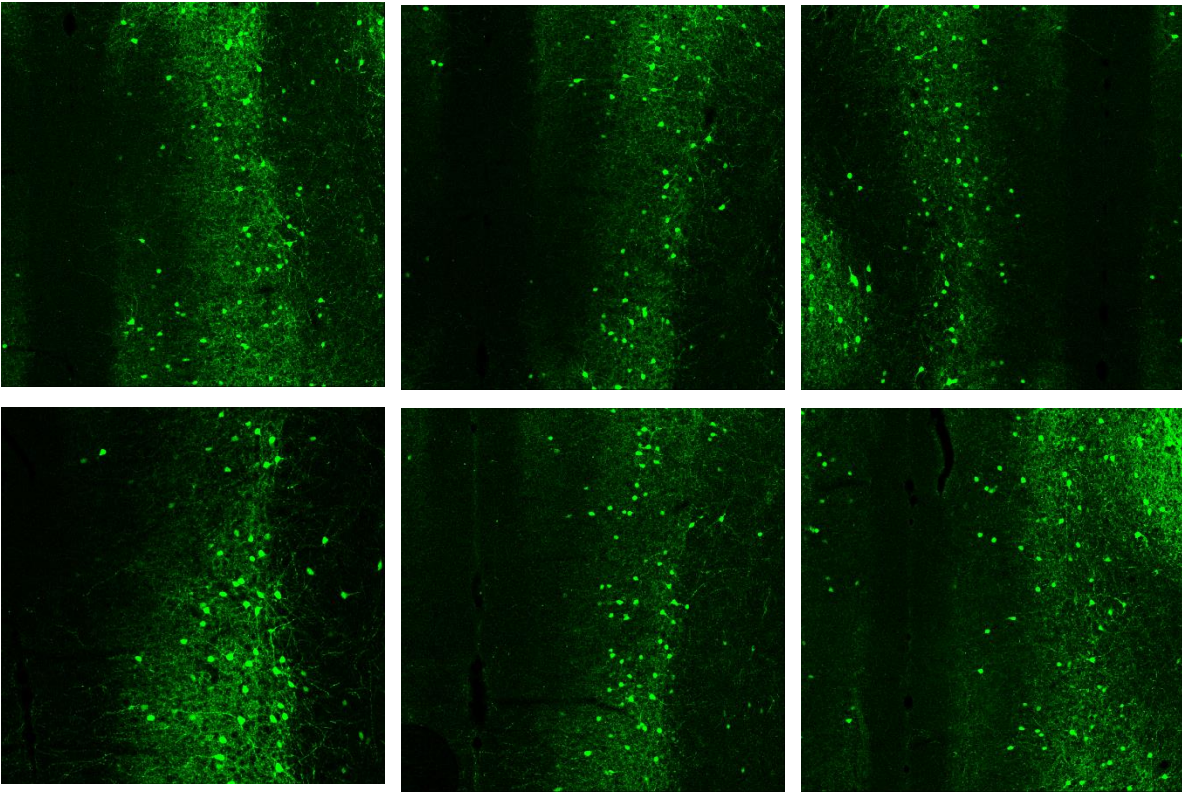

Figure 3C

PV-HET

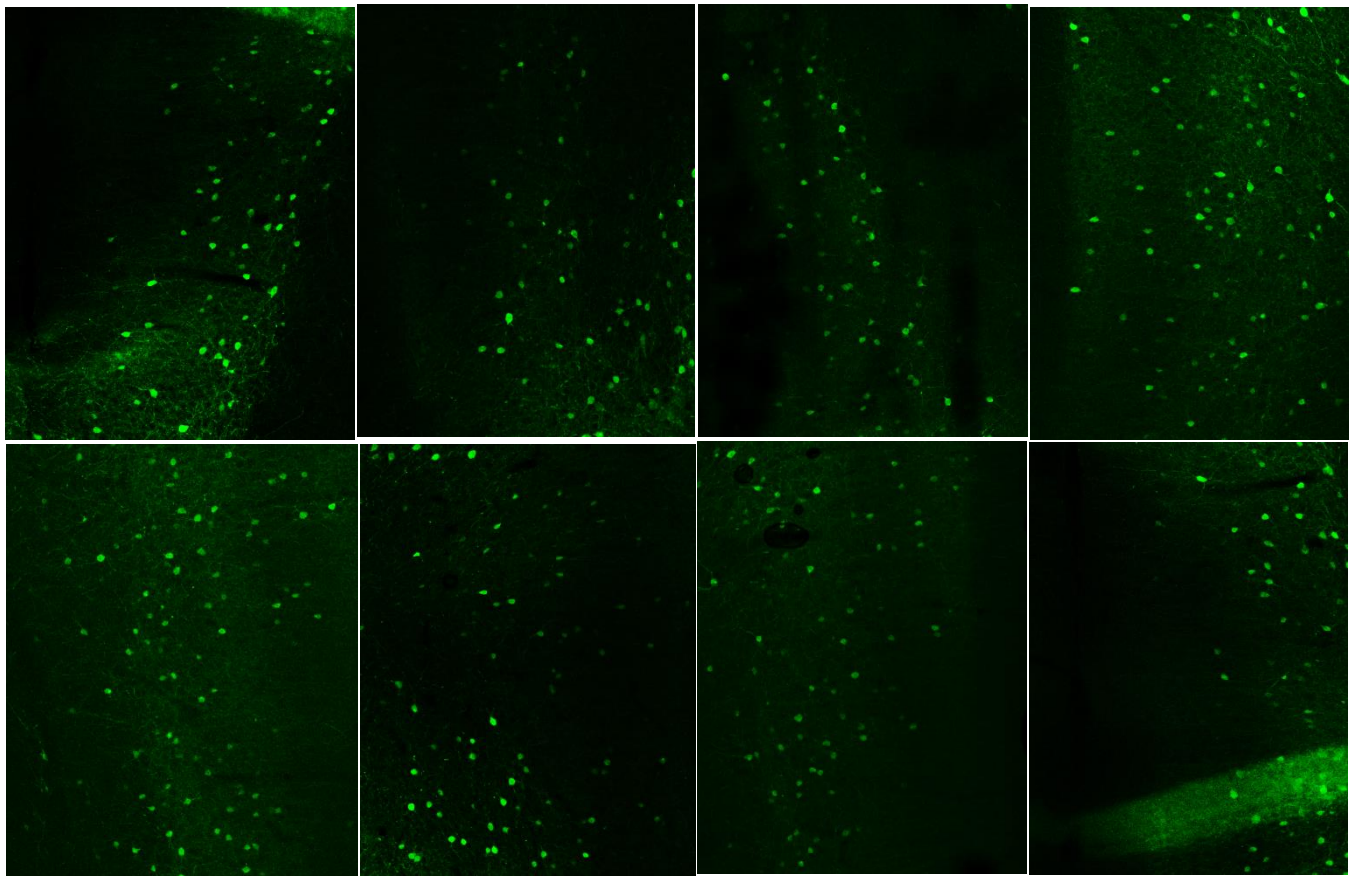

Figure 3C

PV-GluN2C KO

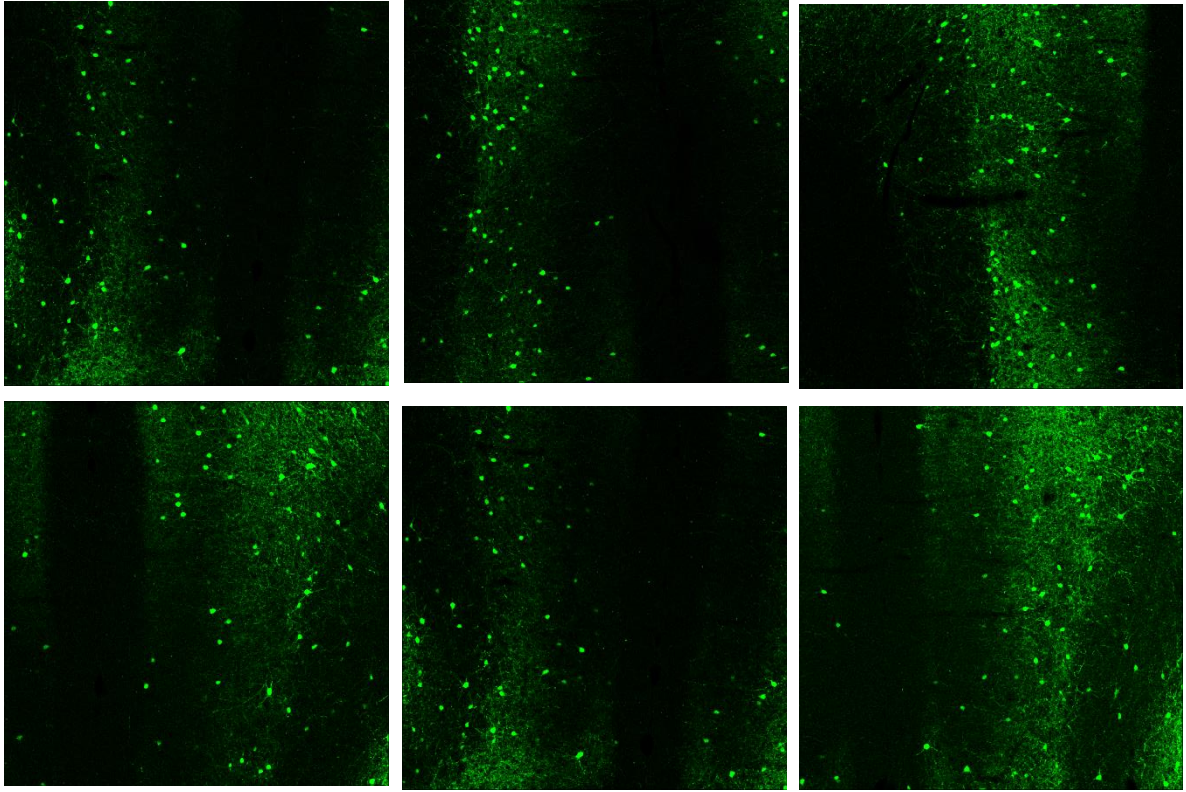

Figure 3E

WT-NeuN and GAD67 staining

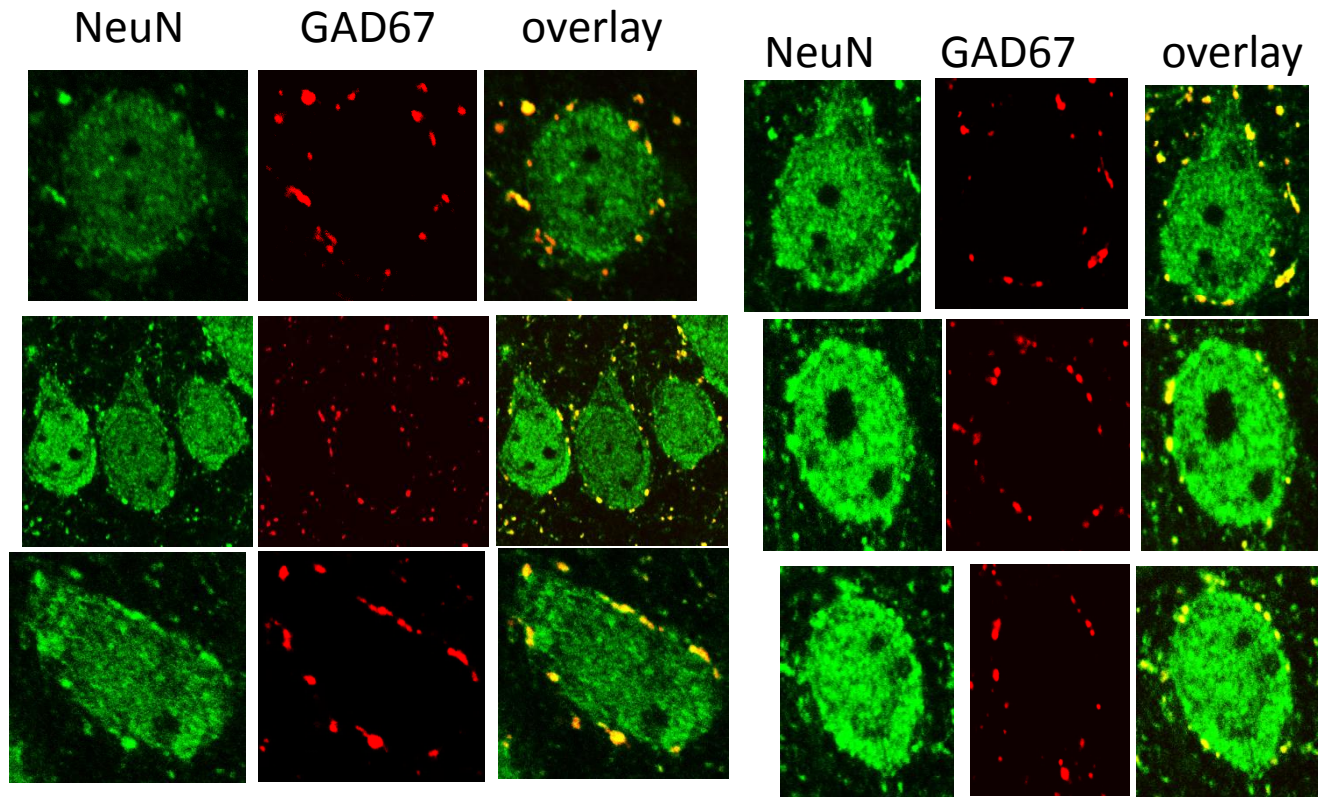

Figure 3E

GluN2C HET-NeuN and GA67 staining

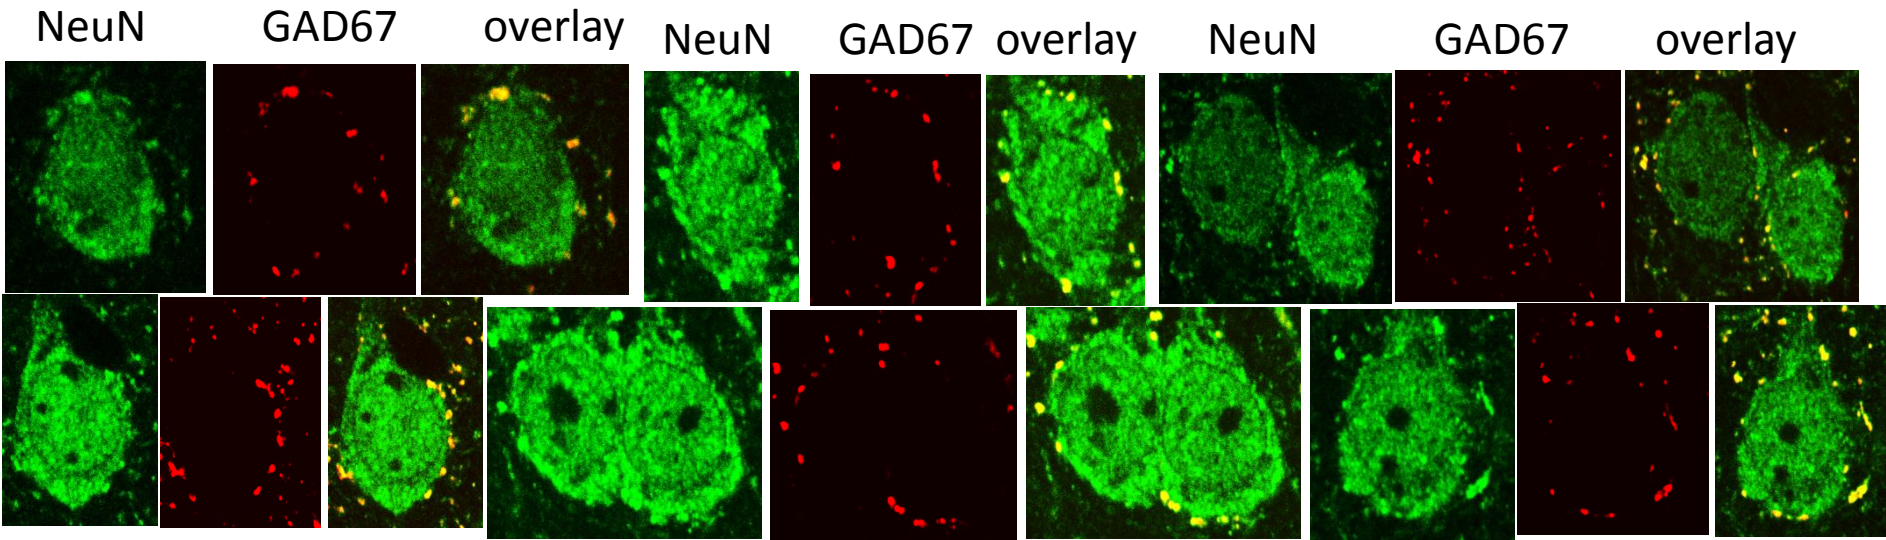

Figure 3E

GluN2C KO- NeuN and GA67 staining

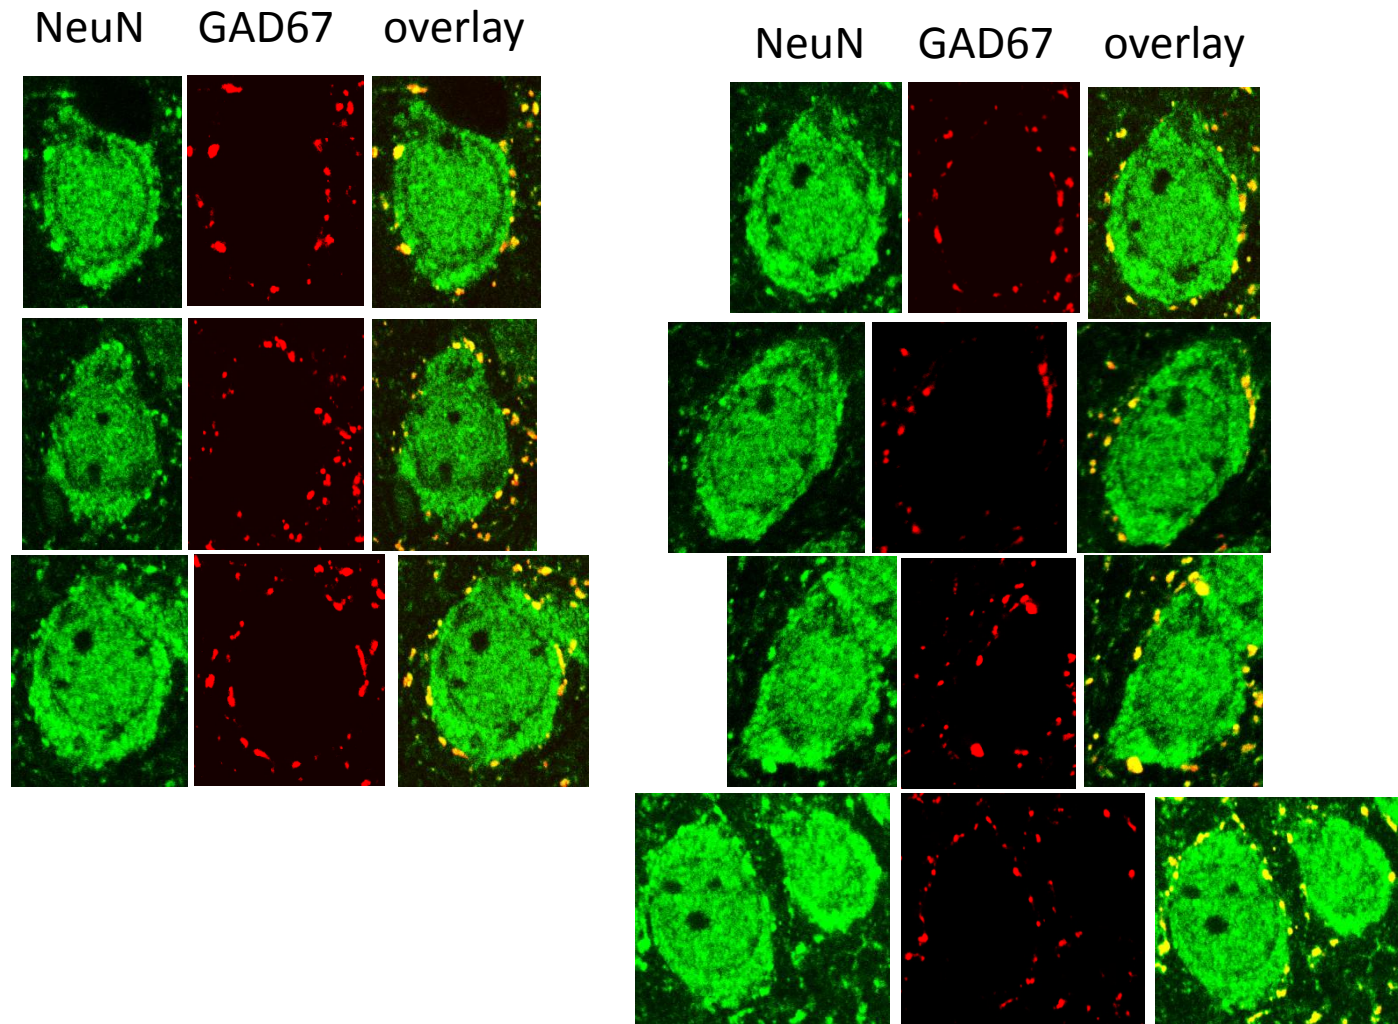

Supplement: srep38321-s1.pdf [file srep38321-s1.pdf]
